# Supplementary material for: Tunable Fungal Monofilaments from Food Waste for Textile Applications
Source: PubMed Central journal article supplement (PMC10935878; doi:10.1002/gch2.202300098), 2023-09-17
Supplement: GCH2-8-2300098-s001.pdf [file GCH2-8-2300098-s001.pdf]

# Global Challenges

---

Open Access

## Supporting Information

for *Global Challenges*., DOI 10.1002/gch2.202300098

Tunable Fungal Monofilaments from Food Waste for Textile Applications

*E. R. Kanishka B Wijayarathna\**, *Ghasem Mohammadkhani*, *Farshad Homayouni Moghadam*,  
*Linn Berglund*, *Jorge A. Ferreira*, *Karin H. Adolfsson*, *Minna Hakkarainen* and *Akram Zamani\**

## Supporting information file - Tunable fungal monofilaments from food waste for textile applications

E R Kanishka B Wijayarathna<sup>1</sup>, Ghasem Mohammadkhani<sup>1</sup>, Farshad Homayouni Moghadam<sup>2</sup>, Linn Berglund<sup>3</sup>, Jorge A. Ferreira<sup>1</sup>, Karin H. Adolfsson<sup>4</sup>, Minna Hakkarainen<sup>4</sup>, Akram Zamani<sup>1</sup>

<sup>1</sup> Swedish Centre for Resource Recovery, University of Borås, Borås SE-501 90, Sweden

<sup>2</sup> Department of Animal Biotechnology, Cell Science Research Center, Royan Institute for Biotechnology, ACECR, Isfahan, Iran

<sup>3</sup> Department of Engineering Sciences and Mathematics, Luleå University of Technology, Luleå SE-971 87, Sweden

<sup>4</sup> Department of Fiber and Polymer Technology, KTH Royal Institute of Technology, Stockholm SE-100 44, Sweden

1. A pair of 20 cm monofilament samples underwent the post treatments and ca 1 cm of drawing was added when the monofilaments were fixed to drying. Depending on the observation the amount of drawing was finalized as 5%.

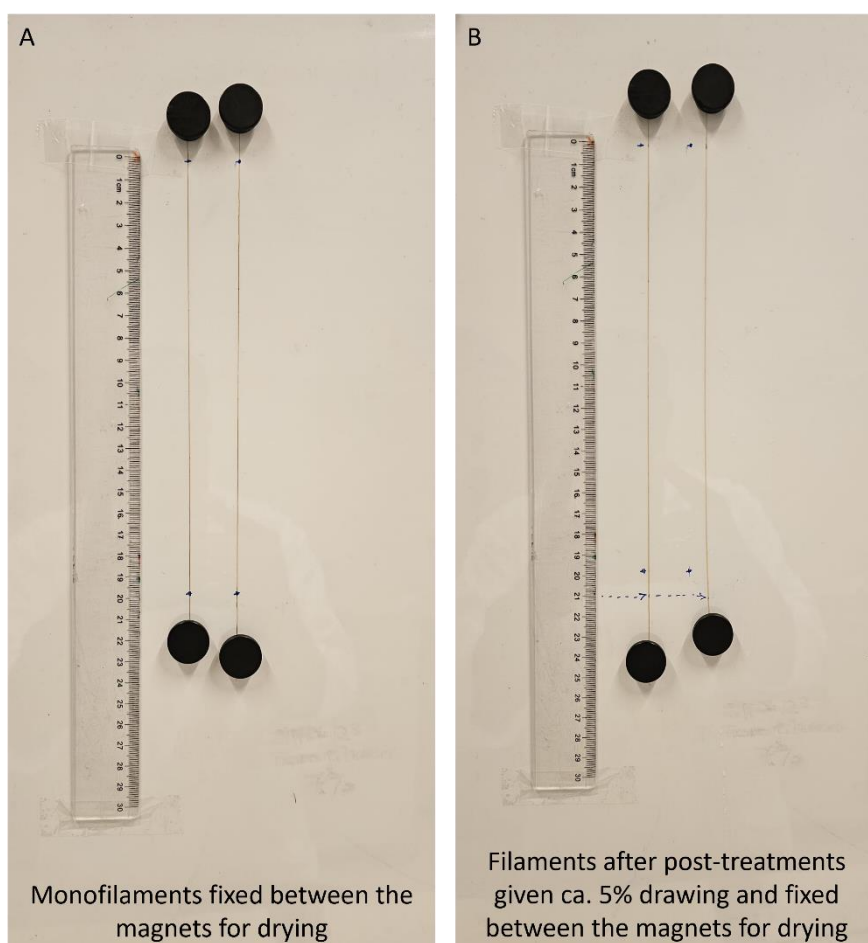

Figure S1: How drawing was added to the fungal monofilaments when drying after the post treatments
